# Supplementary material for: How long do rapid diagnostic tests remain positive after anti-malarial treatment?
Source: Springer Nature journal article supplement (doi:10.1186/s12936-018-2371-9), 2018-06-08
Supplement: MOESM1 [file 15831938]

#### 10 Reference

- 1 Kyabayinze DJ, Tibenderana JK, Odong GW, Rwakimari JB, Counihan H. Operational accuracy and comparative persistent antigenicity of HRP2 rapid diagnostic tests for Plasmodium falciparum malaria in a hyperendemic region of Uganda. *Malar J* 2008; 7: 221.
- 2 Mbabazi P, Hopkins H, Osilo E, Kalungu M, Byakika-Kibwika P, Kanya MR. Accuracy of two malaria rapid diagnostic tests (RDTs) for initial diagnosis and treatment monitoring in a high transmission setting in Uganda. *Am J Trop Med Hyg* 2015; 92: 530–6.
- 3 Mbabazi P, Hopkins H, Osilo E, Kalungu M, Byakika-Kibwika P, Kanya MR. Accuracy of two malaria rapid diagnostic tests (RDTs) for initial diagnosis and treatment monitoring in a high transmission setting in Uganda. *Am J Trop Med Hyg* 2015; 92: 530–6.
- 4 Kattenberg JH, Tahita CM, Versteeg IAJ, et al. Antigen persistence of rapid diagnostic tests in pregnant women in Nanoro, Burkina Faso, and the implications for the diagnosis of malaria in pregnancy. *Trop Med Int Heal* 2012; 17: 550–7.
- 5 Swarthout TD, Counihan H, Senga RKK, van den Broek I. Paracheck-Pf accuracy and recently treated Plasmodium falciparum infections: is there a risk of over-diagnosis? *Malar J* 2007; 6: 58
- 6 Swarthout TD, Counihan H, Senga RKK, van den Broek I. Paracheck-Pf accuracy and recently treated Plasmodium falciparum infections: is there a risk of over-diagnosis? *Malar J* 2007; 6: 58
- 7 Swarthout TD, Counihan H, Senga RKK, van den Broek I. Paracheck-Pf accuracy and recently treated Plasmodium falciparum infections: is there a risk of over-diagnosis? *Malar J* 2007; 6: 58
- 8 Swarthout TD, Counihan H, Senga RKK, van den Broek I. Paracheck-Pf accuracy and recently treated Plasmodium falciparum infections: is there a risk of over-diagnosis? *Malar J* 2007; 6: 58
- 9 Swarthout TD, Counihan H, Senga RKK, van den Broek I. Paracheck-Pf accuracy and recently treated Plasmodium falciparum infections: is there a risk of over-diagnosis? *Malar J* 2007; 6: 58
- 10 Ly AB, Tall A, Perry R, et al. Use of HRP-2 based rapid diagnostic test for Plasmodium falciparum malaria: assessing accuracy and cost-effectiveness in the villages of Dielmo and Ndio, Senegal. *Malar J* 2010; 9: 153
- 11 Houze S, Dicko Boly M, Le Bras J, Deloron P, Faucher J-F. PfHRP2 and PfLDH antigen detection for monitoring the efficacy of artemisinin-based combination therapy (ACT) in the treatment of uncomplicated falciparum malaria. *Malar J* 2009; 8: 211.
- 12 Houze S, Dicko Boly M, Le Bras J, Deloron P, Faucher J-F. PfHRP2 and PfLDH antigen detection for monitoring the efficacy of artemisinin-based combination therapy (ACT) in the treatment of uncomplicated falciparum malaria. *Malar J* 2009; 8: 211.
- 13 Houze S, Dicko Boly M, Le Bras J, Deloron P, Faucher J-F. PfHRP2 and PfLDH antigen detection for monitoring the efficacy of artemisinin-based combination therapy (ACT) in the treatment of uncomplicated falciparum malaria. *Malar J* 2009; 8: 211.
- 14 Houze S, Dicko Boly M, Le Bras J, Deloron P, Faucher J-F. PfHRP2 and PfLDH antigen detection for monitoring the efficacy of artemisinin-based combination therapy (ACT) in the treatment of uncomplicated falciparum malaria. *Malar J* 2009; 8: 211.
- 15 Houze S, Dicko Boly M, Le Bras J, Deloron P, Faucher J-F. PfHRP2 and PfLDH antigen detection for monitoring the efficacy of artemisinin-based combination therapy (ACT) in the treatment of uncomplicated falciparum malaria. *Malar J* 2009; 8: 211.
- 16 Houze S, Dicko Boly M, Le Bras J, Deloron P, Faucher J-F. PfHRP2 and PfLDH antigen detection for monitoring the efficacy of artemisinin-based combination therapy (ACT) in the treatment of uncomplicated falciparum malaria. *Malar J* 2009; 8: 211.
- 17 Mohammed H, Kassa M, Kebede A, Endeshaw T. Paracheck-pf\* Test Versus Microscopy in the diagnosis of falciparum malaria in Arbaminch Zuria woreda of South Ethiopia. *Ethiop J Health Sci* 2012; 22: 93–8.
- 18 Aydin-Schmidt B, Mubi M, Morris U, et al. Usefulness of Plasmodium falciparum-specific rapid diagnostic tests for assessment of parasite clearance and detection of recurrent infections after artemisinin-based combination therapy. *Malar J* 2013; 12: 349.
- 19 Aydin-Schmidt B, Mubi M, Morris U, et al. Usefulness of Plasmodium falciparum-specific rapid diagnostic tests for assessment of parasite clearance and detection of recurrent infections after artemisinin-based combination therapy. *Malar J* 2013; 12: 349.
- 20 Huang NM, Davis TME, Hewitt S, et al. Comparison of three antigen detection methods for diagnosis and therapeutic monitoring of malaria: a field study from southern Vietnam. *Trop Med Int Health* 2002; 7: 304–8.
- 21 Huang NM, Davis TME, Hewitt S, et al. Comparison of three antigen detection methods for diagnosis and therapeutic monitoring of malaria: a field study from southern Vietnam. *Trop Med Int Health* 2002; 7: 304–8.
- 22 Tjitra E, Suprianto SRI, Broom JMC, Currie BJ. Persistent ICT Malaria P. f / P. v Panmalarial and HRP2 Antigen Reactivity after Treatment of Plasmodium falciparum Malaria Is Associated with Gametocytemia and Results in False-Positive Diagnoses of Plasmodium vivax in Convalescence. *J Clin Microbiol* 2001; 39: 1025–31.
- 23 Tjitra E, Suprianto SRI, Broom JMC, Currie BJ. Persistent ICT Malaria P. f / P. v Panmalarial and HRP2 Antigen Reactivity after Treatment of Plasmodium falciparum Malaria Is Associated with Gametocytemia and Results in False-Positive Diagnoses of Plasmodium vivax in Convalescence. *J Clin Microbiol* 2001; 39: 1025–31.
- 24 Tjitra E, Suprianto SRI, Broom JMC, Currie BJ. Persistent ICT Malaria P. f / P. v Panmalarial and HRP2 Antigen Reactivity after Treatment of Plasmodium falciparum Malaria Is Associated with Gametocytemia and Results in False-Positive Diagnoses of Plasmodium vivax in Convalescence. *J Clin Microbiol* 2001; 39: 1025–31.
- 25 Tjitra E, Suprianto SRI, Broom JMC, Currie BJ. Persistent ICT Malaria P. f / P. v Panmalarial and HRP2 Antigen Reactivity after Treatment of Plasmodium falciparum Malaria Is Associated with Gametocytemia and Results in False-Positive Diagnoses of Plasmodium vivax in Convalescence. *J Clin Microbiol* 2001; 39: 1025–31.
- 26 Tjitra E, Suprianto SRI, Broom JMC, Currie BJ. Persistent ICT Malaria P. f / P. v Panmalarial and HRP2 Antigen Reactivity after Treatment of Plasmodium falciparum Malaria Is Associated with Gametocytemia and Results in False-Positive Diagnoses of Plasmodium vivax in Convalescence. *J Clin Microbiol* 2001; 39: 1025–31.
- 27 Tjitra E, Suprianto SRI, Broom JMC, Currie BJ. Persistent ICT Malaria P. f / P. v Panmalarial and HRP2 Antigen Reactivity after Treatment of Plasmodium falciparum Malaria Is Associated with Gametocytemia and Results in False-Positive Diagnoses of Plasmodium vivax in Convalescence. *J Clin Microbiol* 2001; 39: 1025–31.
- 28 Iqbal J, Siddique A, Jameel M, Hira PR. Persistent Histidine-Rich Protein 2, Parasite Lactate Dehydrogenase, and Panmalarial Antigen Reactivity after Clearance of Plasmodium falciparum Mono-infection. *J Clin Microbiol* 2004; 42: 4237–41.
- 29 Iqbal J, Siddique A, Jameel M, Hira PR. Persistent Histidine-Rich Protein 2, Parasite Lactate Dehydrogenase, and Panmalarial Antigen Reactivity after Clearance of Plasmodium falciparum Mono-infection. *J Clin Microbiol* 2004; 42: 4237–41.
- 30 Iqbal J, Siddique A, Jameel M, Hira PR. Persistent Histidine-Rich Protein 2, Parasite Lactate Dehydrogenase, and Panmalarial Antigen Reactivity after Clearance of Plasmodium falciparum Mono-infection. *J Clin Microbiol* 2004; 42: 4237–41.
- 31 Rubio JM, Buhigas I, Subirats M, Baquero M, Puente S. Limited Level of Accuracy Provided by Available Rapid Diagnosis Tests for Malaria Enhances the Need for PCR-Based Reference Laboratories. 2001; 39: 2736–7.
- 32 Rubio JM, Buhigas I, Subirats M, Baquero M, Puente S. Limited Level of Accuracy Provided by Available Rapid Diagnosis Tests for Malaria Enhances the Need for PCR-Based Reference Laboratories. 2001; 39: 2736–7.
- 33 Grandesso F, Nabasumba C, Nyehangane D, et al. Performance and time to become negative after treatment of three malaria rapid diagnostic tests in low and high malaria transmission settings. *Malar J* 2016; 15:496.
- 34 Grandesso F, Nabasumba C, Nyehangane D, et al. Performance and time to become negative after treatment of three malaria rapid diagnostic tests in low and high malaria transmission settings. *Malar J* 2016; 15:496.
- 35 Grandesso F, Nabasumba C, Nyehangane D, et al. Performance and time to become negative after treatment of three malaria rapid diagnostic tests in low and high malaria transmission settings. *Malar J* 2016; 15:496.
- 36 Grandesso F, Nabasumba C, Nyehangane D, et al. Performance and time to become negative after treatment of three malaria rapid diagnostic tests in low and high malaria transmission settings. *Malar J* 2016; 15:496.
- 37 Grandesso F, Nabasumba C, Nyehangane D, et al. Performance and time to become negative after treatment of three malaria rapid diagnostic tests in low and high malaria transmission settings. *Malar J* 2016; 15:496.
- 38 Grandesso F, Nabasumba C, Nyehangane D, et al. Performance and time to become negative after treatment of three malaria rapid diagnostic tests in low and high malaria transmission settings. *Malar J* 2016; 15:496.
- 39 Grandesso F, Nabasumba C, Nyehangane D, et al. Performance and time to become negative after treatment of three malaria rapid diagnostic tests in low and high malaria transmission settings. *Malar J* 2016; 15:496.
- 40 Grandesso F, Nabasumba C, Nyehangane D, et al. Performance and time to become negative after treatment of three malaria rapid diagnostic tests in low and high malaria transmission settings. *Malar J* 2016; 15:496.
- 41 Grandesso F, Nabasumba C, Nyehangane D, et al. Performance and time to become negative after treatment of three malaria rapid diagnostic tests in low and high malaria transmission settings. *Malar J* 2016; 15:496.
- 42 Singh N, Mishra AK, Shukla MM, Chand SK, Bharti PK. Diagnostic and prognostic utility of an inexpensive rapid on site malaria diagnostic test ( ParaHIT f ) among ethnic tribal population in areas of high , low and no transmission in central India. 2005; 5: 1–5.
- 43 Mayxay M, Pukrittayakamee S, Chotivanich K, Loareesuwan S, White NJ. Persistence of Plasmodium falciparum malaria falciparum HRP-2 in successfully treated acute. *Trans R Soc Trop Med Hyg* 2001; 95: 179–82.
- 44 Humar A, Oht K, Harrington MA, Pillai D, Kain KC. ParasightF Test compared with the polymerase chain reaction and microscopy for the diagnosis of Plasmodium falciparum malaria in travelers. *Am J Trop Med Hyg* 1997; 56: 44–8.
- 45 Shiff CJ, Premji Z, Diseases I. The rapid manual ParaSight-F falciparum infection test. A new diagnostic tool for Plasmodium falciparum infection. *Trans R Soc Trop Med Hyg* 1993; 87: 646–8.
- 46 Karbwang J, Tansan O, Kanda T, et al. Parasight-F Plasmodium test for the detection falciparum malaria. *Trans R Soc Trop Med Hyg* 1996; 90: S13–5.
- 47 Fogg C, Twesigye R, Batwala V, et al. Assessment of three new parasite lactate dehydrogenase (pan-pLDH) tests for diagnosis of uncomplicated malaria. *Trans R Soc Trop Med Hyg* 2008; 102: 25–31.
- 48 Fogg C, Twesigye R, Batwala V, et al. Assessment of three new parasite lactate dehydrogenase (pan-pLDH) tests for diagnosis of uncomplicated malaria. *Trans R Soc Trop Med Hyg* 2008; 102: 25–31.
- 49 Fogg C, Twesigye R, Batwala V, et al. Assessment of three new parasite lactate dehydrogenase (pan-pLDH) tests for diagnosis of uncomplicated malaria. *Trans R Soc Trop Med Hyg* 2008; 102: 25–31.
- 50 Fogg C, Twesigye R, Batwala V, et al. Assessment of three new parasite lactate dehydrogenase (pan-pLDH) tests for diagnosis of uncomplicated malaria. *Trans R Soc Trop Med Hyg* 2008; 102: 25–31.
- 51 Yadav RK, Singh MV, Singh DK, et al. Comparative study of RDTs vs microscopy for the diagnosis of malaria in children. *J Evol Med Dent Sci* 2014; 3: 6152–7.
- 52 Nyunt MH, Kyaw MP, Win KK, Myint KM, Nyunt KM. Field evaluation of HRP2 and pan pLDH-based immunochromatographic assay in therapeutic monitoring of uncomplicated falciparum malaria in Myanmar. 2013; 12:123.
- 53 Nyunt MH, Kyaw MP, Win KK, Myint KM, Nyunt KM. Field evaluation of HRP2 and pan pLDH-based immunochromatographic assay in therapeutic monitoring of uncomplicated falciparum malaria in Myanmar. 2013; 12:123.
- 54 Mharakurwa S, Shiff CJ. Post treatment sensitivity studies with the Parasight-F test for malaria diagnosis in Zimbabwe. *Acta Trop* 1997; 66: 61–7.
- 55 Mueller I, Betuela I, Ginny M, Reeder JC, Genton B. The Sensitivity of the OptiMAL Rapid Diagnostic Test to the Presence of Plasmodium falciparum Gametocytes Compromises Its Ability To Monitor Treatment Outcomes in an Area of Papua New Guinea in which Malaria Is Endemic. *PLoS One* 2007; 45: 627–30.
- 56 Kibuzi AL, Gaby J, Mulumba T, et al. SD Bioline malaria antigen Pf (HRP-2/ LDH) for assessing efficacy of artemisinin combination therapy against Plasmodium falciparum in pediatric patients in the Democratic Republic of the Congo. *Pan Afr Med J* 2015; 8688: 1–7.
- 57 Kibuzi AL, Gaby J, Mulumba T, et al. SD Bioline malaria antigen Pf (HRP-2/ LDH) for assessing efficacy of artemisinin combination therapy against Plasmodium falciparum in pediatric patients in the Democratic Republic of the Congo. *Pan Afr Med J* 2015; 8688: 1–7.
- 58 Gerstl S, Dunckley S, Mukhtar A, Smet M De, Baker S, Maikere J. Assessment of two malaria rapid diagnostic tests in children under five years of age , with follow- up of false-positive pLDH test results , in a hyperendemic falciparum malaria area, Sierra Leone. *Mal. J.* 2010; 9:28.
- 59 Nour B, Schallig H, Mens P, Elbushra S, Sa O, Mohamadani A. Use of Rapid Diagnostic Tests (RDTs) to monitor the efficacy of anti-malaria therapy in Gezira, Sudan- A prospective, assessor- blind comparative study. *Int J Med* 2009; 2: 257–62.
- 60 Nour B, Schallig H, Mens P, Elbushra S, Sa O, Mohamadani A. Use of Rapid Diagnostic Tests (RDTs) to monitor the efficacy of anti-malaria therapy in Gezira, Sudan- A prospective, assessor- blind comparative study. *Int J Med* 2009; 2: 257–62.
- 61 Kocharekar MM, Sarkar SS, Dasgupta D. Comparative Study of Modified Quantitative Buffy Coat and Two Rapid Tests in Comparison with Peripheral Blood Smear in Malaria Diagnosis in Mumbai, India. *J Parasitol Res.* 2014; 2014: 194651.
- 62 Kocharekar MM, Sarkar SS, Dasgupta D. Comparative Study of Modified Quantitative Buffy Coat and Two Rapid Tests in Comparison with Peripheral Blood Smear in Malaria Diagnosis in Mumbai, India. *J Parasitol Res.* 2014; 2014: 194651.
- 63 Moody A, Hunt-Cooke A, Gabbett E, Chiodini P. Performance of the OptiMAL malaria antigen capture dipstick for malaria diagnosis and treatment monitoring at the Hospital for Tropical Diseases, London. *Br J Haematol* 2000; 109: 891–4.
- 64 Miller RS, McDaniel P, Wongsrichanalai C. Following the course of malaria treatment by detecting parasite lactate dehydrogenase enzyme. *Br J Haematol* 2001; 113: 558–62.
- 65 Wongsrichanalai C, Chuanak N, Tulayon S, Thanosingha N. Comparison of a rapid field immunochromatographic test to expert microscopy for the detection of Plasmodium falciparum asexual parasitemia in Thailand. 1999; 73: 263–73.
- 66 Djimde AA, Malga H, Sagara I, et al. Field assessment of SD bioline malaria species antigen detection by rapid diagnostic tests in Mali. *J Parasitol Vector Biol* 2016; 8.
- 67 Djimde AA, Malga H, Sagara I, et al. Field assessment of SD bioline malaria species antigen detection by rapid diagnostic tests in Mali. *J Parasitol Vector Biol* 2016; 8.
